# Supplementary material
Source: HighWire-hosted journal article supplement (http://www.cmaj.ca/highwire/filestream/68016/field_highwire_adjunct_files/0/170118-guide-1-at.pdf)
Supplement: 170118-guide-1-at.pdf [file 170118-guide-1-at.pdf]

## Appendix 1: Analytic framework and questions (as supplied by the authors)

The analytic framework, presented below, includes screening of asymptomatic adults. The numbers in brackets indicate CTFPHC's GRADE<sup>1</sup> rankings for each outcome (7-9=critical; 4-6=important; 1-3 not important and therefore not included here).

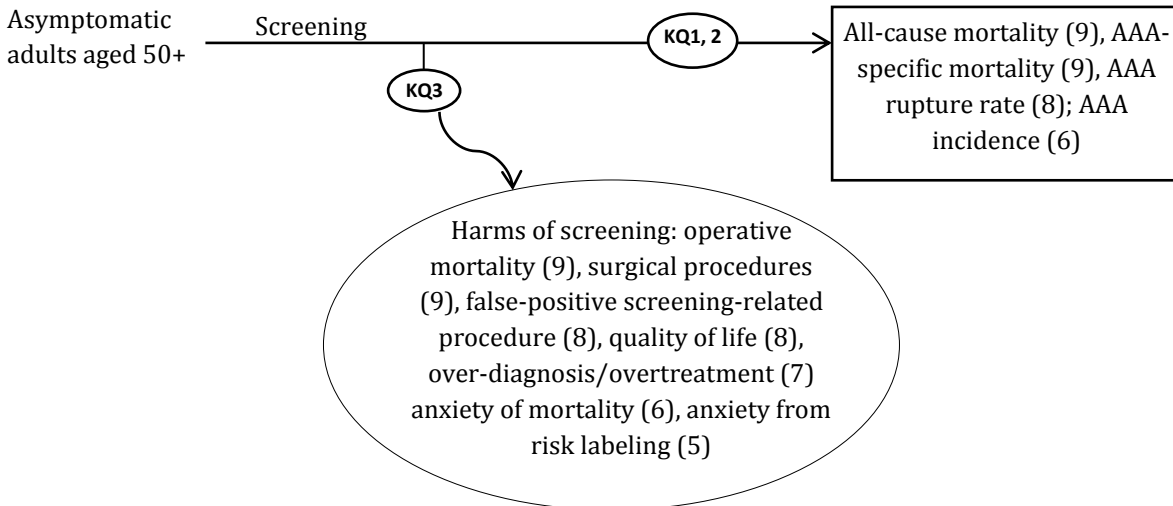

### KEY QUESTIONS

1. What is the effect of one-time AAA screening using ultrasound on health outcomes in asymptomatic adults aged 50 years and older?
  - a. Does the effect of one-time screening vary between men and women, smokers and non-smokers, older ( $\geq 65$  years) and younger ( $< 65$  years) adults, adults with and without a family history of AAA, and adults of different races/ethnicities.
  - b. Does the effect of one-time screening vary between different screening approaches (i.e. high risk vs low risk status)?
2. What is the effect of rescreening for AAA using ultrasound on health outcomes including AAA incidence in previously screened asymptomatic adults aged 50 years and older?
  - a. Does the effect of rescreening vary between men and women, smokers and non-smokers, older ( $\geq 65$  years) and younger ( $< 65$  years) adults, adults with and without a family history of AAA, and adults of different races/ethnicities.
  - b. Does the effect of rescreening vary between different time intervals?
3. What are the harms associated with one-time and repeated AAA screening using ultrasound?

### CONTEXTUAL QUESTIONS

1. What are patients' preferences and values regarding AAA screening?
2. What is the cost-effectiveness of screening for AAA?
3. How well does ultrasound administered in a general practice setting or which can be administered in a general practice setting compare to standard ultrasound in a clinic or hospital setting for the detection of AAA?

## Reference

1. Schünemann H, Brożek J, Guyatt G, Oxman A. GRADE handbook for grading the quality of evidence and strength of recommendations. 2013 Oct. Available: <http://gdt.guidelinedevelopment.org/app/handbook/handbook.html> (accessed 2017 Jan 16).
